# Supplementary material for: Different Time Scale Distribution of Negative Air Ions Concentrations in Mount Wuyi National Park
Source: MDPI journal article supplement (doi:10.3390/ijerph18095037), 2021-05-10
Supplement: s1 [file s1]

**Table S1.** Division of the week according to date and weekly average data of NAIs concentrations.

| Week | Data                  | Week | Data                  | Week | Data                  | Week | Data                  |
|------|-----------------------|------|-----------------------|------|-----------------------|------|-----------------------|
| 1    | 2018/10/01-2018/10/07 | 18   | 2019/01/28-2019/02/03 | 35   | 2019/05/27-2019/06/02 | 52   | 2019/09/23-2019/09/29 |
| 2    | 2018/10/08-2018/10/14 | 19   | 2019/02/04-2019/02/10 | 36   | 2019/06/03-2019/06/09 | 53   | 2019/09/30-2019/10/06 |
| 3    | 2018/10/15-2018/10/21 | 20   | 2019/02/11-2019/02/17 | 37   | 2019/06/10-2019/06/16 | 54   | 2019/10/07-2019/10/13 |
| 4    | 2018/10/22-2018/10/28 | 21   | 2019/02/18-2019/02/24 | 38   | 2019/06/17-2019/06/23 | 55   | 2019/10/14-2019/10/20 |
| 5    | 2018/10/29-2018/11/04 | 22   | 2019/02/25-2019/03/03 | 39   | 2019/06/24-2019/06/30 | 56   | 2019/10/21-2019/10/27 |
| 6    | 2018/11/05-2018/11/11 | 23   | 2019/03/04-2019/03/10 | 40   | 2019/07/01-2019/07/07 | 57   | 2019/10/28-2019/11/03 |
| 7    | 2018/11/12-2018/11/18 | 24   | 2019/03/11-2019/03/17 | 41   | 2019/07/08-2019/07/14 | 58   | 2019/11/04-2019/11/10 |
| 8    | 2018/11/19-2018/11/25 | 25   | 2019/03/18-2019/03/24 | 42   | 2019/07/15-2019/07/21 | 59   | 2019/11/11-2019/11/17 |
| 9    | 2018/11/26-2018/12/02 | 26   | 2019/03/25-2019/03/31 | 43   | 2019/07/22-2019/07/28 | 60   | 2019/11/18-2019/11/24 |
| 10   | 2018/12/03-2018/12/09 | 27   | 2019/04/01-2019/04/07 | 44   | 2019/07/29-2019/08/04 | 61   | 2019/11/25-2019/12/01 |
| 11   | 2018/12/10-2018/12/16 | 28   | 2019/04/08-2019/04/14 | 45   | 2019/08/05-2019/08/11 | 62   | 2019/12/02-2019/12/08 |
| 12   | 2018/12/17-2018/12/23 | 29   | 2019/04/15-2019/04/21 | 46   | 2019/08/12-2019/08/18 | 63   | 2019/12/09-2019/12/15 |
| 13   | 2018/12/24-2018/12/30 | 30   | 2019/04/22-2019/04/28 | 47   | 2019/08/19-2019/08/25 | 64   | 2019/12/16-2019/12/22 |
| 14   | 2018/12/31-2019/01/06 | 31   | 2019/04/29-2019/05/05 | 48   | 2019/08/26-2019/09/01 | 65   | 2019/12/23-2019/12/29 |
| 15   | 2019/01/07-2019/01/13 | 32   | 2019/05/06-2019/05/12 | 49   | 2019/09/02-2019/09/08 | 66   | 2019/12/30-2020/01/05 |
| 16   | 2019/01/14-2019/01/20 | 33   | 2019/05/13-2019/05/19 | 50   | 2019/09/09-2019/09/15 | 67   | 2020/01/06-2020/01/12 |
| 17   | 2019/01/21-2019/01/27 | 34   | 2019/05/20-2020/05/26 | 51   | 2019/09/16-2019/09/22 | 68   | 2020/01/13-2020/01/19 |
